# Supplementary material for: Translocator protein is a marker of activated microglia in rodent models but not human neurodegenerative diseases
Source: PubMed Central journal article supplement (PMC10462763; doi:10.1038/s41467-023-40937-z), 2023-08-28
Supplement: 41467_2023_40937_MOESM3_ESM.pdf [file 41467_2023_40937_MOESM3_ESM.pdf]

## **Description of Additional Supplementary Files**

File name: Supplementary Data 1

Description: Human and mouse WGCNA TSPO modules and GO analyses

File name: Supplementary Data 2

Description: Multiple sequence alignment and phylogenetic tree construction

File name: Supplementary Data 3

Description: Statistical file
